# Supplementary material for: Amorphous CoxSy-loaded Mn0.5Cd0.5S solid solution for effective generation of H2 by visible-light photocatalysis
Source: Royal Society of Chemistry journal article supplement (doi:10.1039/d3nj02912c), 2023-01-01
Supplement: d3nj02912c1.pdf [file d3nj02912c1.pdf]

# Electronic Supplementary Information

## Amorphous $\text{Co}_x\text{S}_y$ loaded $\text{Mn}_{0.5}\text{Cd}_{0.5}\text{S}$ solid solution for effective visible-light photocatalytic $\text{H}_2$ generation

Yawen Niu,<sup>a</sup> Shan-Shan Xu,<sup>b</sup> Yanhui Zhang,<sup>a</sup> Yanmei Chen,<sup>a</sup> Jian-Feng Li,<sup>b</sup> Juan Xu<sup>a\*</sup>

<sup>a</sup> College of Chemistry, Chemical Engineering and Environment, Fujian Provincial Key Laboratory of Modern Analytical Science and Separation Technology, Fujian Provincial University Key Laboratory of Pollution Monitoring and Control, Minnan Normal University, Zhangzhou, 363000, China.

<sup>b</sup> College of Physical Science and Technology, College of Materials, State Key Laboratory of Physical Chemistry of Solid Surface, College of Chemistry and Chemical Engineering, College of Energy, Fujian Key Laboratory of Advanced Materials, Xiamen University, Xiamen 361005, China.

\*To whom correspondence should be addressed. E-mail Address:  
xjzhejiang.2008@163.com

Table S1 The elemental content ratio  $\text{Mn}_{0.5}\text{Cd}_{0.5}\text{S}$  and  $\text{Co}_x\text{S}_y$  for obtained from XPS test.

| Sample                                   | Element | Atomic ratio (%) |
|------------------------------------------|---------|------------------|
| $\text{Mn}_{0.5}\text{Cd}_{0.5}\text{S}$ | Mn      | 14.82            |
|                                          | Cd      | 13.09            |
|                                          | S       | 23.95            |
| $\text{Co}_x\text{S}_y$                  | Co      | 13.23            |
|                                          | S       | 17.42            |

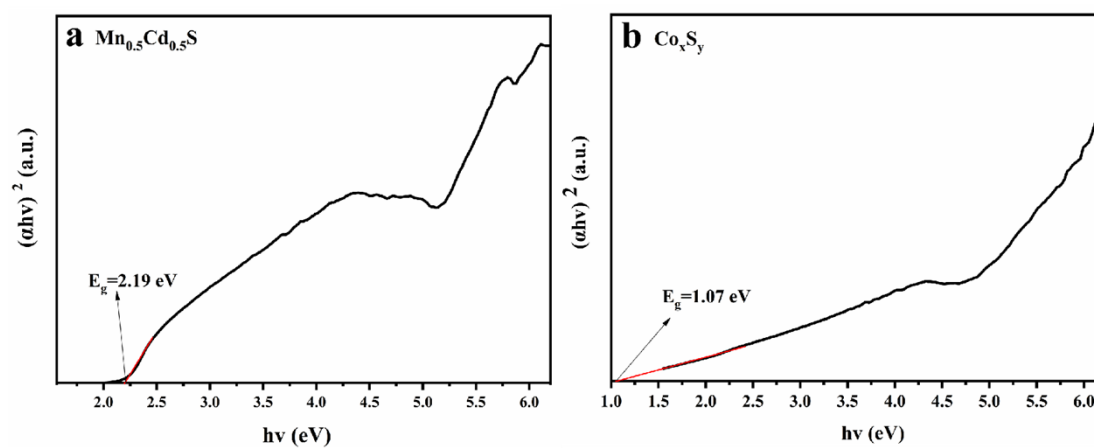

Figure S1 Tauc plot of (a)  $\text{Mn}_{0.5}\text{Cd}_{0.5}\text{S}$  and (b)  $\text{Co}_x\text{S}_y$ .

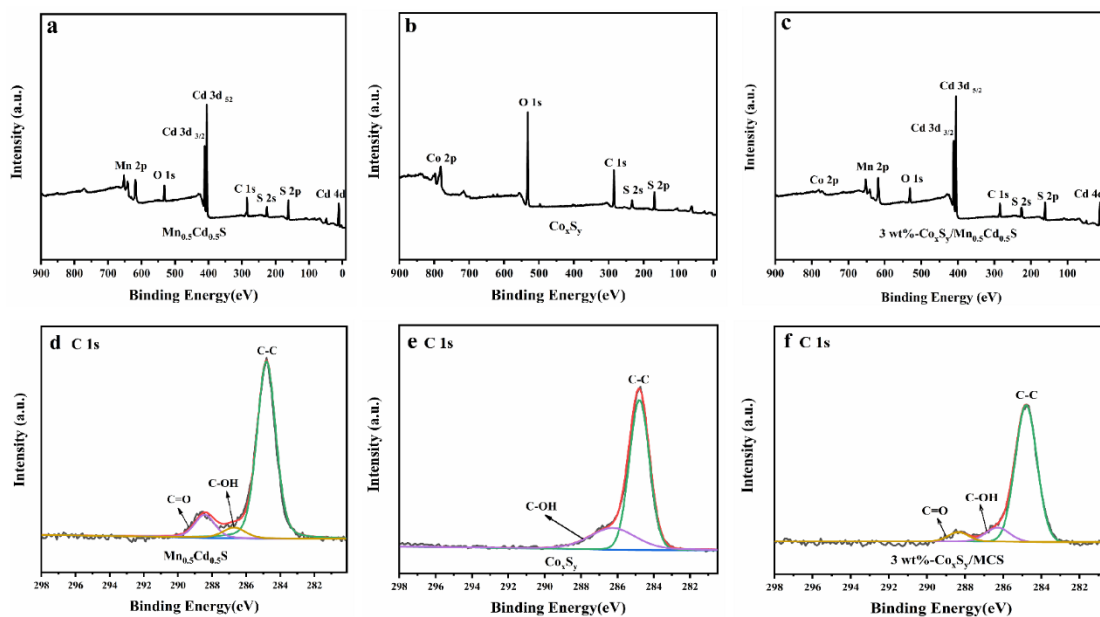

Figure S2 The survey spectrum and the high resolution XPS spectrum for C 1s spectrum of  $Mn_{0.5}Cd_{0.5}S$ ,  $Co_xS_y$ , and 3 wt%- $Co_xS_y/Mn_{0.5}Cd_{0.5}S$ .

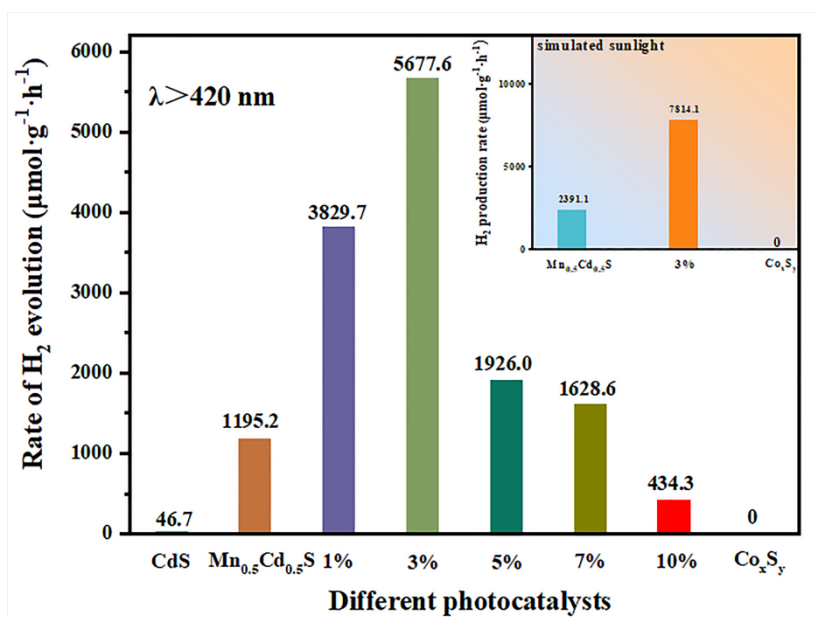

Figure S3  $H_2$  evolution rate of  $Mn_{0.5}Cd_{0.5}S$  and composite catalysts under  $\lambda > 420$  nm and simulated sunlight irradiation.

Table S1 Comparison of H<sub>2</sub> evolution performances between the as-obtained 3 wt%-Co<sub>x</sub>S<sub>y</sub>/Mn<sub>0.5</sub>Cd<sub>0.5</sub>S in this study and other photo catalytic systems in literatures.

| Catalysts                                                               | Dosage | Light condition                     | Sacrificial agent                                                   | H <sub>2</sub> production rate | Literature source |
|-------------------------------------------------------------------------|--------|-------------------------------------|---------------------------------------------------------------------|--------------------------------|-------------------|
| P/Mn <sub>0.25</sub> Cd <sub>0.75</sub> S                               | 30 mg  | 300 W Xe lamp (λ>400 nm)            | No sacrificial agents                                               | 863 μmol/h/g                   | [1]               |
| MoS <sub>2</sub> /Mn <sub>0.5</sub> Cd <sub>0.5</sub> S                 | 50 mg  | 300 W Xe lamp (λ>420 nm)            | 0.35 M Na <sub>2</sub> S and 0.25 M Na <sub>2</sub> SO <sub>3</sub> | 3951.2 μmol/h/g                | [2]               |
| Co <sub>x</sub> S <sub>y</sub> /Mn <sub>0.5</sub> Cd <sub>0.5</sub> S   | 30 mg  | 300 W Xe lamp (λ>420 nm)            | 0.5 M Na <sub>2</sub> S and 0.5 Na <sub>2</sub> SO <sub>3</sub>     | 5677.6 μmol/h/g                | This work         |
| NiCo <sub>2</sub> S <sub>4</sub> /Mn <sub>0.2</sub> Cd <sub>0.8</sub> S | 10 mg  | 300 W Xe lamp                       | Na <sub>2</sub> S/Na <sub>2</sub> SO <sub>3</sub>                   | 5677.8 μmol/h/g                | [3]               |
| CNTs/Mn <sub>0.5</sub> Cd <sub>0.5</sub> S                              | 30 mg  | 300 W Xe lamp (λ≥420 nm)            | TEOA                                                                | 869 μmol/h/g                   | [4]               |
| Mn <sub>0.2</sub> Cd <sub>0.8</sub> S/CoTiO <sub>3</sub>                | 10 mg  | 5 W light-emitting diode (λ≥420 nm) | Na <sub>2</sub> S/Na <sub>2</sub> SO <sub>3</sub>                   | 2764 μmol/h/g                  | [5]               |
| TiO <sub>2</sub> /Mn <sub>0.2</sub> Cd <sub>0.8</sub> S                 | 20 mg  | 300W Xe lamp                        | 0.35 M Na <sub>2</sub> S and 0.25M Na <sub>2</sub> SO <sub>3</sub>  | 5822.94 μmol/h/g               | [6]               |
| Bi <sub>2</sub> MoO <sub>6</sub> /Mn <sub>0.2</sub> Cd <sub>0.8</sub> S | 50 mg  | 300 W Xe lamp (λ>420 nm)            | 0.35 M Na <sub>2</sub> S and 0.25 M Na <sub>2</sub> SO <sub>3</sub> | 1500 μmol/h/g                  | [7]               |

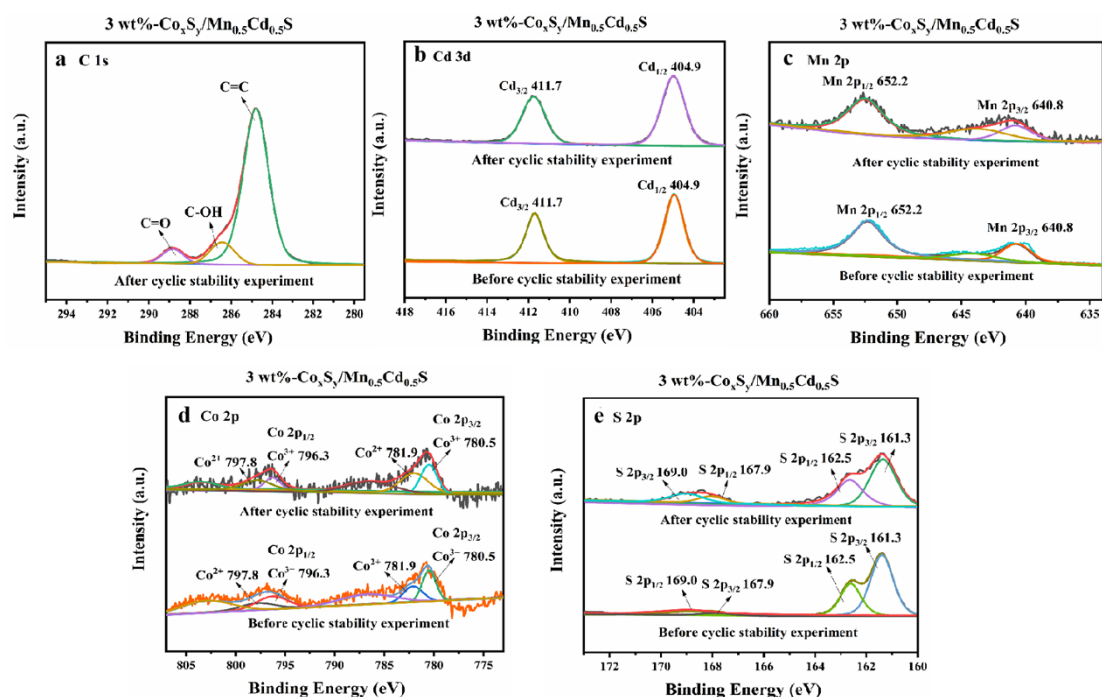

Figure S4 (a)-(e) The C 1s spectrum and the high resolution XPS spectrum for Cd 3d, Mn 2p, Co 2p, and S 2p spectrum of 3 wt%-Co<sub>x</sub>S<sub>y</sub>/Mn<sub>0.5</sub>Cd<sub>0.5</sub>S after cyclic stability experiment.

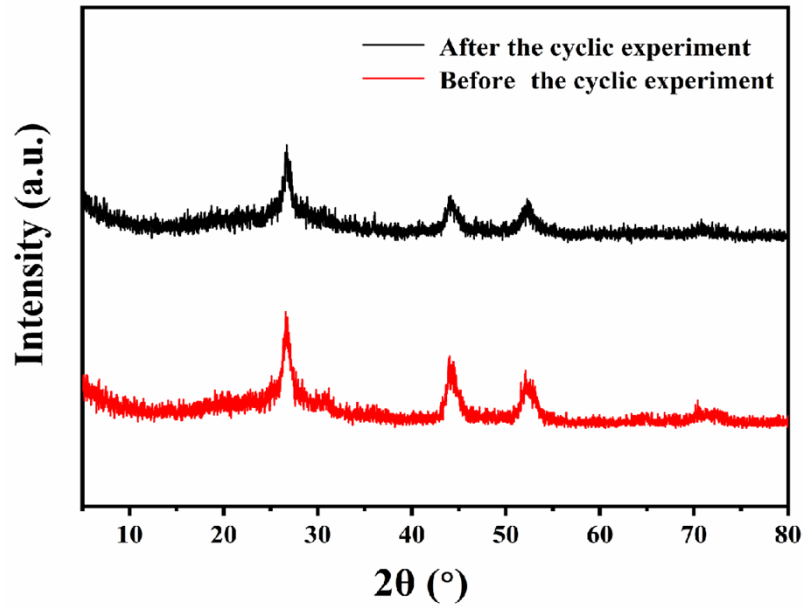

Figure S5 XRD of 3 wt%-  $\text{Co}_x\text{S}_y/\text{Mn}_{0.5}\text{Cd}_{0.5}\text{S}$  before and after the cyclic experiment.

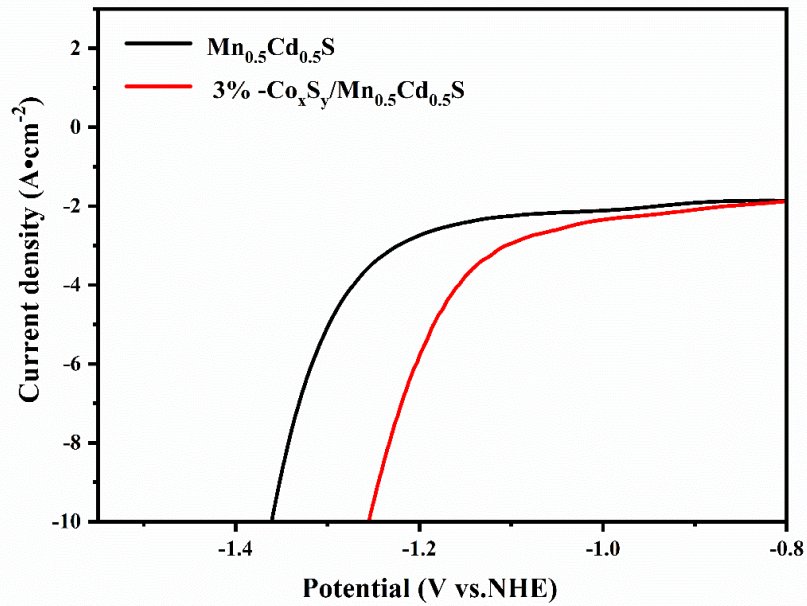

Figure S6 LSV plots for catalysts  $\text{Mn}_{0.5}\text{Cd}_{0.5}\text{S}$  and 3 wt%- $\text{Co}_x\text{S}_y/\text{Mn}_{0.5}\text{Cd}_{0.5}\text{S}$ .

Table S3 Energy band structure information of  $\text{Mn}_{0.5}\text{Cd}_{0.5}\text{S}$  and  $\text{Co}_x\text{S}_y$ .

| Samples                     | $\text{Mn}_{0.5}\text{Cd}_{0.5}\text{S}$ | $\text{Co}_x\text{S}_y$ |
|-----------------------------|------------------------------------------|-------------------------|
| Bandgap energy (eV)         | 2.19                                     | 1.07                    |
| Conduction band vs.NHE (eV) | (-0.93)~(-1.13)                          | (-1.10)~(-1.30)         |
| Valance band vs.NHE (eV)    | 1.06~1.26                                | (-0.03)~(-0.23)         |

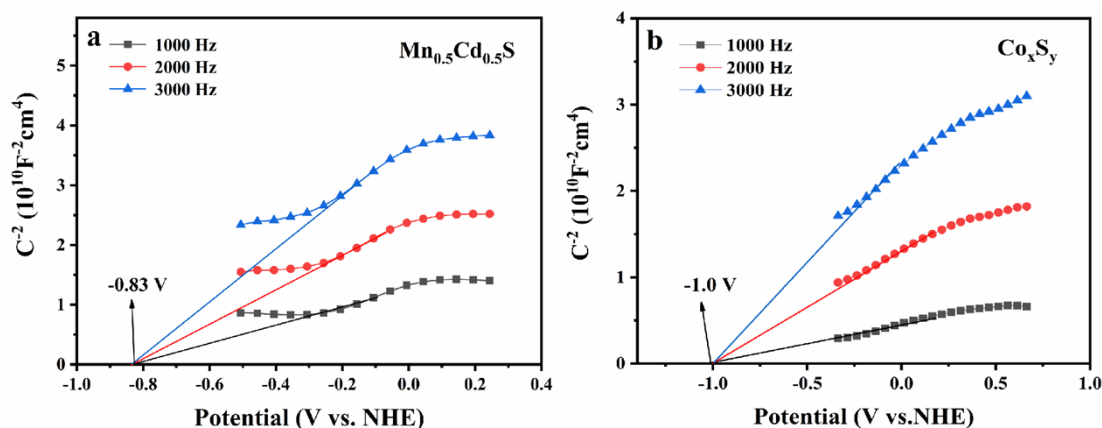

Figure S7 Mott-Schottky plots of (a)  $\text{Mn}_{0.5}\text{Cd}_{0.5}\text{S}$  and (b)  $\text{Co}_x\text{S}_y$ .

## References

1. X.-Y Meng, L. Shi, X.-Y Dai, S. Zhang, G. Liu and W. Qi, *Sustainable Energy Fuels*, 2021, **5**, 6460-6469.
2. X.-L Liu, Q. Liu, P. Wang, Y.-Z Liu, B.-B Huang, E.-A. Rozhkova, Q.-Q Zhang, Z.-Y Wang, Y. Dai and J. Lu, *Chem. Eng. J.*, 2018, **337**, 480-487.
3. Y. Shang, J. Xu, Y. Ma, Z.-Z Li and Q. Li, *New J. Chem.*, 2023, Advance Article.
4. X.-Y Meng, L. Shi, L.-S Cui, L.-Z Yao and Y. Zhang, *Mater. Res. Bull.*, 2021, **135**, 111156.
5. T.-X Liu, K.-C Yang, H.-M Gong and Z.-L Jin, *Renewable Energy*, 2021, **173**, 389-400.
6. G.-S Xiao, J.-Q Pan, Y.-Y Fu, Y.-Y Zhang, W.-D Fu, J.-J Niu, J.-J Wang, Y.-Y Zheng and C.-R Li, *Int. J. Hydrogen Energy*, 2021, **46**, 28565-28574.
7. X.-M Liu, B.-Q Wu, X.-Y Chen, L.-S Yan, H.-Q Guo, K.-X Li, L.-P Xu and J. Lin, *Int. J. Hydrogen Energy*, 2020, **45**, 2884-2895.
